# Supplementary material
Source: PubMed Central journal article supplement (PMC6777560)

Additional file 1: Figure S1. Electropherograms for CRC269.

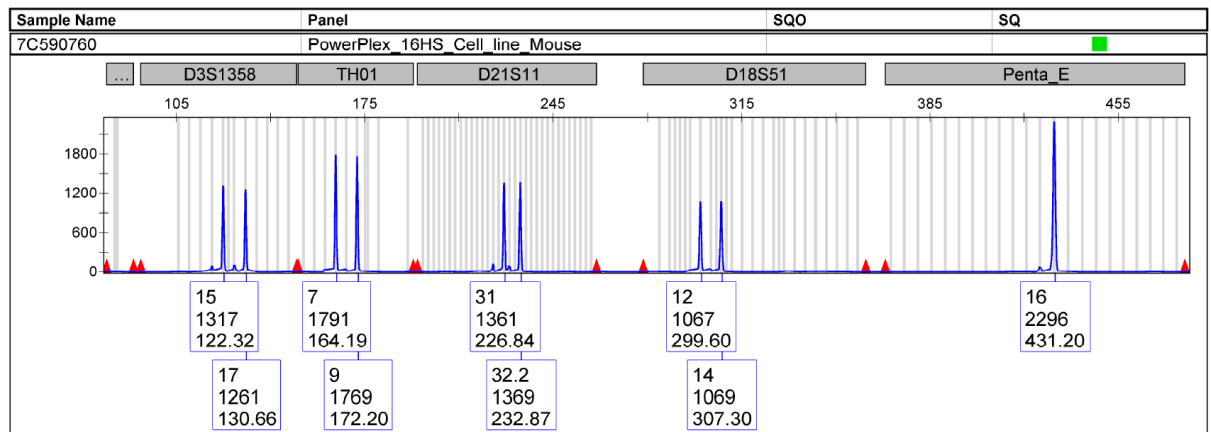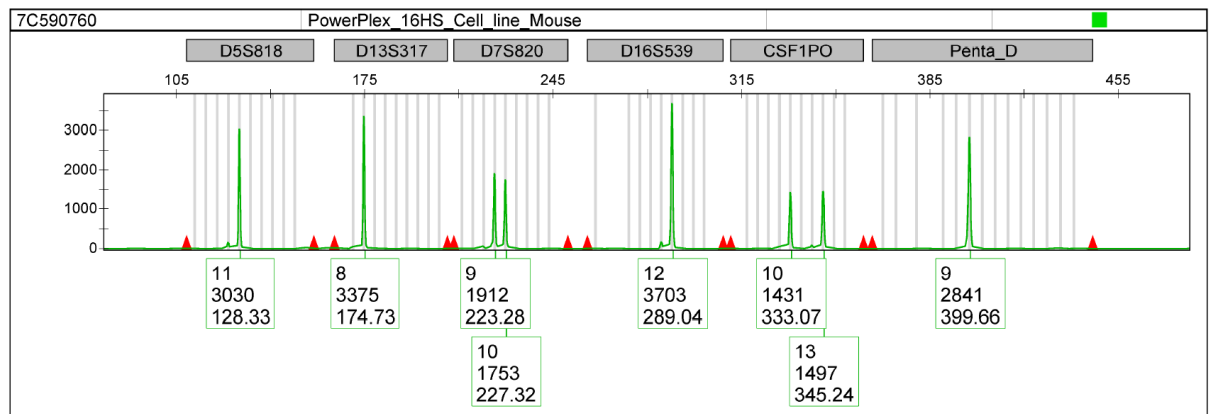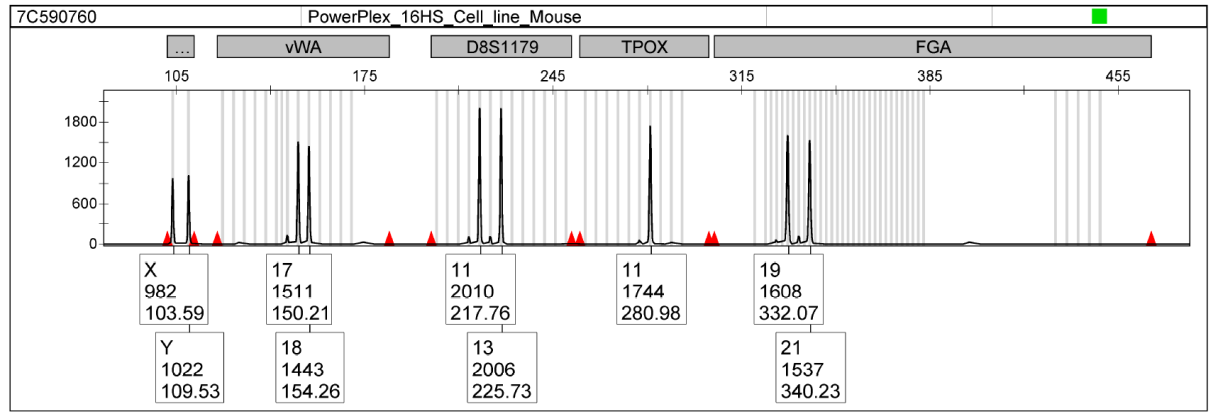

Additional file 2: Figure S2. Electropherograms for CRC269-R.

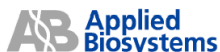

171205026

GeneMapper ID v3.2.1

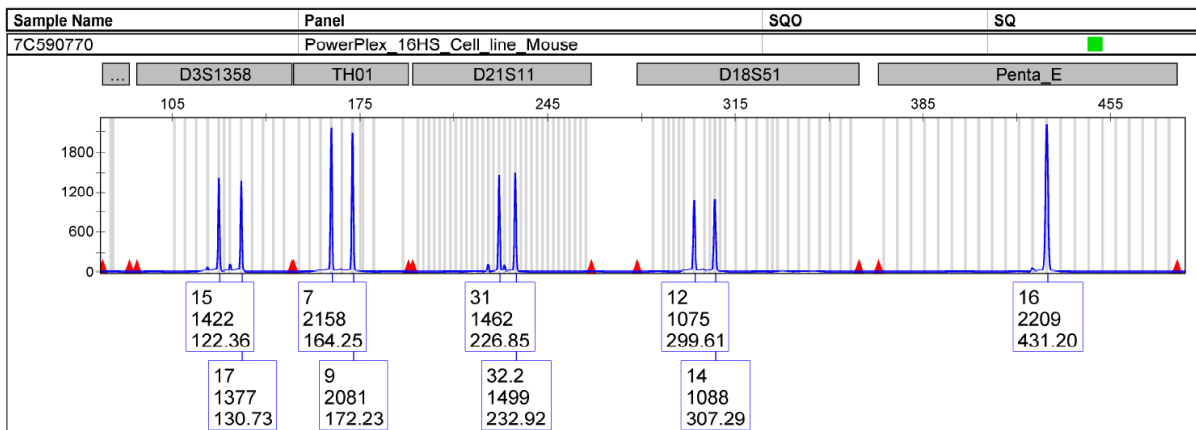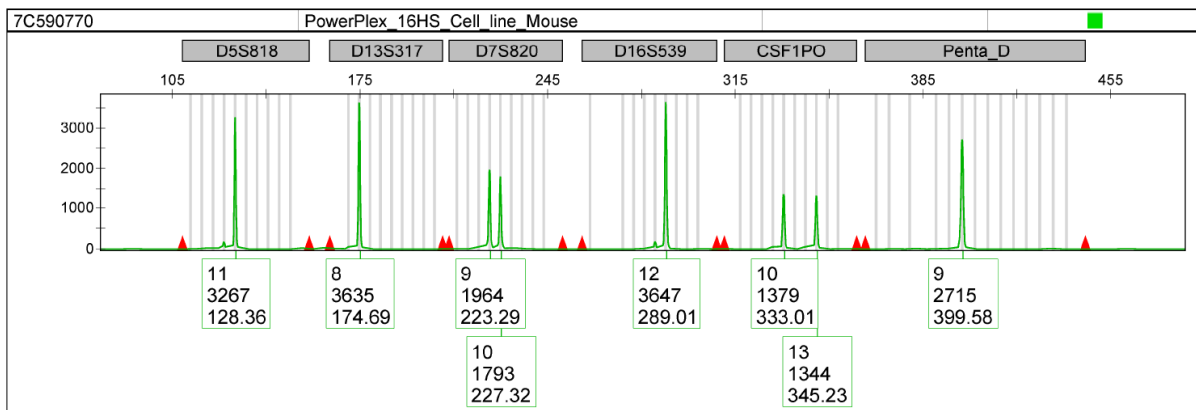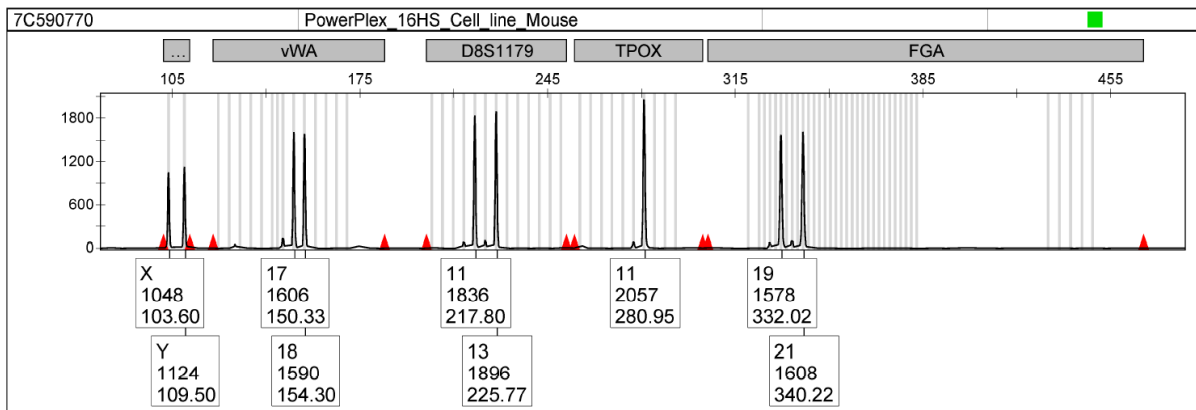

Additional file 3: Figure S3. Electropherograms for CRC263.

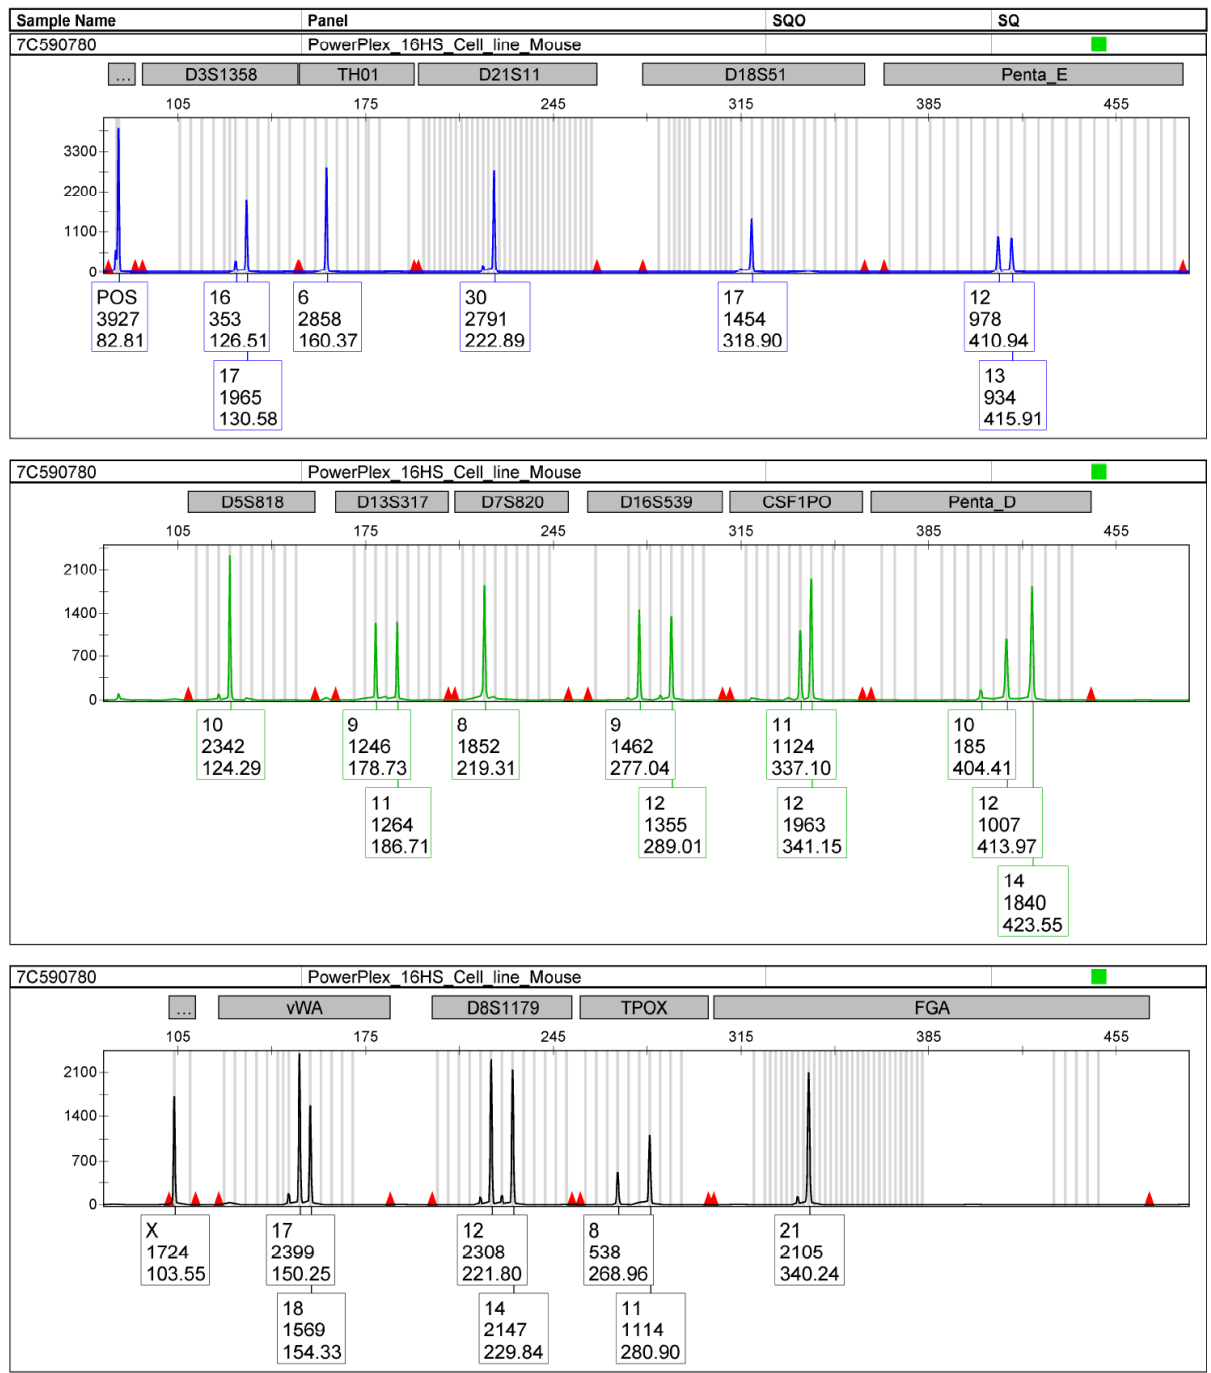

Additional file 4: Figure S4. Electropherograms for CRC382.

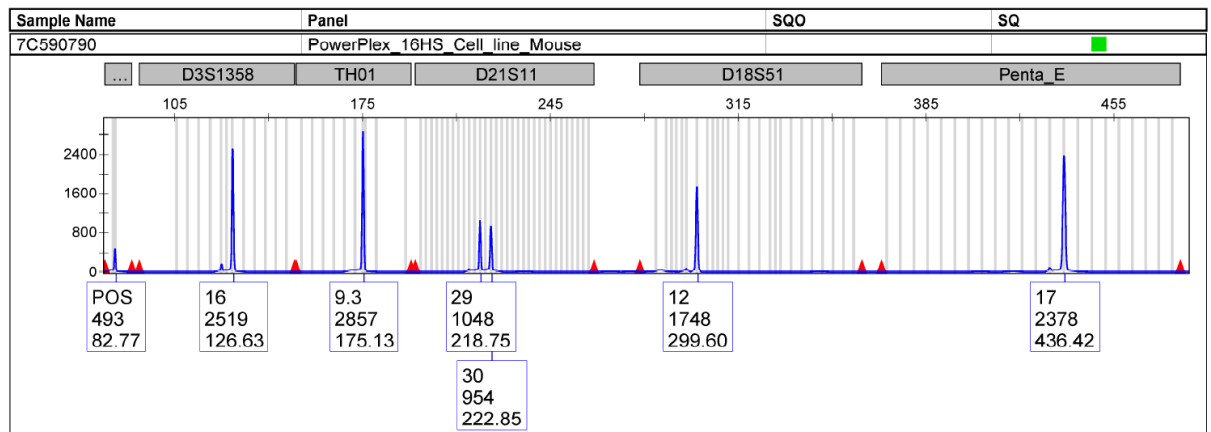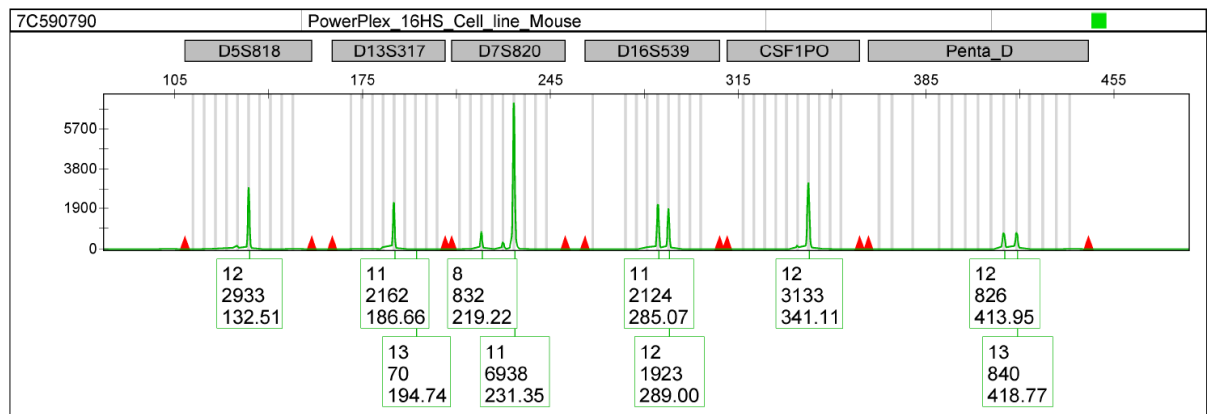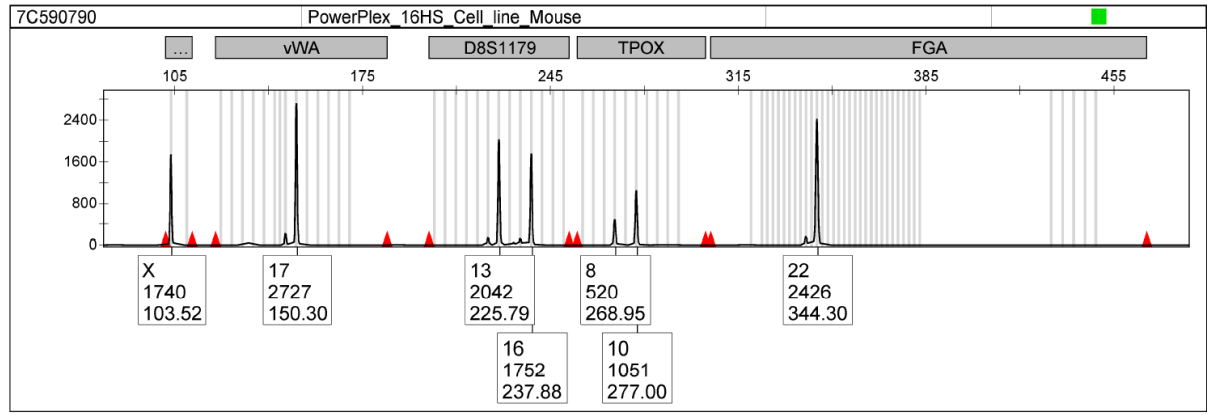

**Additional file 5: Figure S5. Original scans of the immunoblots.**

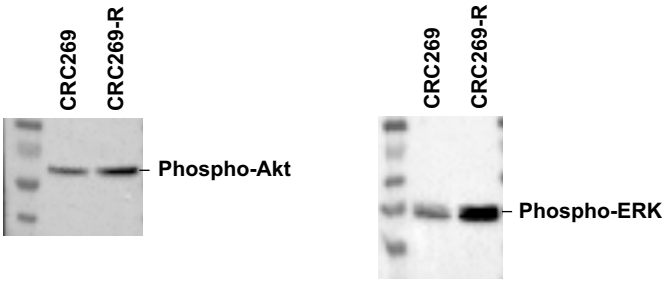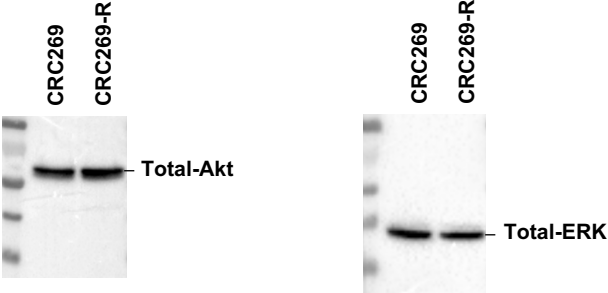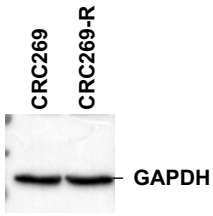

Supplement: NIHMS1534462-supplement-1.pdf [file NIHMS1534462-supplement-1.pdf]
