# Supplementary material
Source: PubMed Central journal article supplement (PMC6777560)
Supplement: NIHMS1534462-supplement-5.pdf [file NIHMS1534462-supplement-5.pdf]

# Supplemental Table Primers used for PCR amplification and sequencing.

| PDX CRC ID                | Gene Symbol         | Primer                | Sequence 5'--3'             |
|---------------------------|---------------------|-----------------------|-----------------------------|
| CRC269<br>and<br>CRC269-R | FAT4                | Forward               | GTGTCTGTGGTTGAGAATGC        |
|                           |                     | Reverse               | TGGACCGGGTAGAAGACAGG        |
|                           | KMT2C               | Forward               | TGAAGAGTGGCTCCAGGAGA        |
|                           |                     | Reverse               | CCTGTTCTAGCTGTTTCTGAACC     |
|                           | PIK3CA (for c.2176) | Forward               | ACAGTTAGCCAGAGGTTTGG        |
|                           |                     | Reverse               | AAACAACCTGCCCCACTGC         |
|                           | PIK3CA (for c.3140) | Forward               | AGCTATTCGACAGCATGCCA        |
|                           |                     | Reverse               | GGTCTTGCCTGCTGAGAGT         |
|                           | KMT2D (for c.2438)  | Forward               | CTATGCGCTGTGCCTGAGG         |
|                           |                     | Reverse               | CTTCTCAAGCTCAGGGGAC         |
|                           | KMT2D (for c.7411)  | Forward               | GTTACCCCTCGTTCAGTC          |
|                           |                     | Reverse               | CTTGGACCTTGGCATGGAG         |
|                           | FOXA1               | Forward               | GGCTTCTTACTCGTGTCT          |
|                           |                     | Reverse               | CTACTGCGCCGGACTCAG          |
|                           | SYNE1               | Forward               | TGTTGTGGGGTTTCATTCGT        |
|                           |                     | Reverse               | TGCATTTTCCCTGGCTCACA        |
|                           | ZFR2                | Forward               | GGGGCTTGGTGTGTGTTTG         |
|                           |                     | Reverse               | GTAGGTAGCCATGGTGGTGG        |
| ADCY2                     | Forward             | GGAGGCTCTTAGAAACCAGAA |                             |
|                           | Reverse             | CCTGGTGGGATGTGAAAAGT  |                             |
| CRC293                    | ARID1A              | Forward               | GCCCTGAACAATAACCTCACG       |
|                           |                     | Reverse               | GGTTGCCCGAAGCCGTAG          |
|                           | TP53 (for c.626)    | Forward               | GCTGGGGCTGGAGAGACG          |
|                           |                     | Reverse               | GCACCACCACACTATGTCGA        |
|                           | TP53 (for c.743)    | Forward               | TGGCTCTGACTGTACCACCA        |
|                           |                     | Reverse               | CTG GAG TCT TCC AGT GTG ATG |
|                           | SYNE2               | Forward               | TTGGCGTCTCTCAGAACAGC        |
|                           |                     | Reverse               | CGATGTTTACAGCTGGAACA        |
|                           | EP300               | Forward               | TGGTGATTCCAGTCTGAATGAGT     |
|                           |                     | Reverse               | ACAAATCCGGAGCTAGCCAC        |
|                           | CDKN2A              | Forward               | GCTTCCTTCCGTCATGCC          |
|                           |                     | Reverse               | TGGAAGCTCTCAGGGTACAA        |
| MTOR                      | Forward             | TGATGAACTTCGAAGCTGTGC |                             |
|                           | Reverse             | CTCAGTGACCTTCTTCTGCA  |                             |
| CRC382                    | ATM                 | Forward               | CTCAAACCTATTGGGTGGATTTGT    |
|                           |                     | Reverse               | TCGTTTGCAGAAAGTGTGCA        |
|                           | TP53 (for c.610)    | Forward               | GCTGGGGCTGGAGAGACG          |
|                           |                     | Reverse               | GCACCACCACACTATGTCGA        |
|                           | TP53 (for c.25)     | Forward               | TGCTGGATCCCCACTTTTCC        |
|                           |                     | Reverse               | AGACAAGAGCAGAAAAGTCAGTC     |
|                           | KLF5                | Forward               | CGTTGTCACAGGTGAAAAGCC       |
|                           |                     | Reverse               | GTGGTCAGAGCGGAGAAG          |
|                           | MERTK               | Forward               | TGTGTGTGTATGTGTGTGTGT       |
|                           |                     | Reverse               | ATGCTGCAATTCCTGAACGG        |
|                           | MYH10               | Forward               | CTGTGTACGTATGTAATAGGGGCA    |
|                           |                     | Reverse               | CCACTTGAAAATCCAAAATATGCTTCT |
|                           | NUP98               | Forward               | GCCTAGTCCCTCGTGAAAAGTC      |
|                           |                     | Reverse               | GCATCAAGAAATGTGACTCACGG     |
| SETD2                     | Forward             | GCCTATGTGGATCCCAGCAA  |                             |
|                           | Reverse             | GCACTGGCAAGACAGCAAC   |                             |
